# Supplementary material
Source: publisher figshare collection journal article supplement (https://tandf.figshare.com/ndownloader/files/12469898)

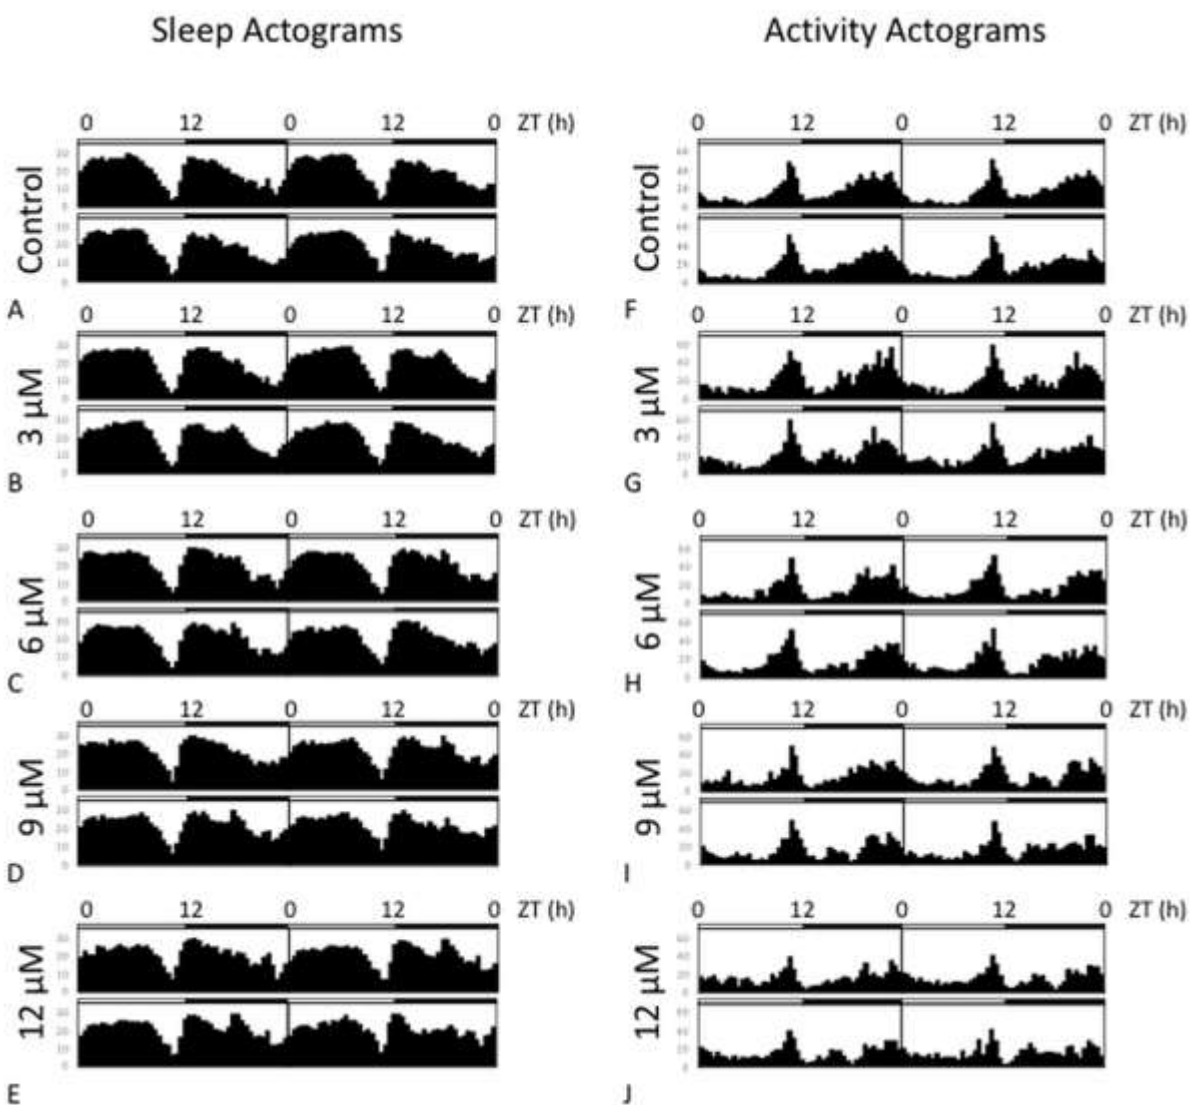

Supplementary Figure 1

Supplement: Supplementary file 1 [file 12469898]
